# Supplementary material for: Pisa Syndrome in Parkinson's Disease: Electromyographic Aspects and Implications for Rehabilitation
Source: PubMed Central journal article supplement (PMC4670865; doi:10.1155/2015/437190), 2015-11-23
Supplement: 437190.f1.pdf [file 437190.f1.pdf]

**Table 2. EMG data during MVMC (0: sub-interferential pattern; 1: Interferential pattern).**

| ID | EO   | EO    | QL   | QL    | RA   | RA    | PSp  | PSp   | Most affected       | PS        |
|----|------|-------|------|-------|------|-------|------|-------|---------------------|-----------|
|    | left | right | left | right | left | right | left | Right | side of PD symptoms | direction |
| 1  | 0    | 1     | 0    | 1     | 0    | 1     | 1    | 1     | R                   | R         |
| 2  | 0    | 1     | 1    | 0     | 0    | 1     | 1    | 0     | R                   | L         |
| 3  | 0    | 1     | 1    | 0     | 0    | 0     | 0    | 1     | L                   | R         |
| 4  | 1    | 0     | 1    | 1     | 1    | 0     | 1    | 0     | L                   | R         |
| 5  | 0    | 1     | 0    | 1     | 1    | 0     | 1    | 0     | L                   | R         |
| 6  | 1    | 1     | 1    | 0     | 1    | 0     | 1    | 1     | L                   | L         |
| 7  | 1    | 0     | 0    | 1     | 0    | 1     | 0    | 1     | L                   | R         |
| 8  | 0    | 1     | 0    | 1     | 0    | 1     | 0    | 1     | L                   | R         |
| 9  | 0    | 1     | 0    | 1     | 0    | 1     | 1    | 0     | L                   | L         |
| 10 | 0    | 0     | 1    | 0     | 1    | 0     | 1    | 1     | R                   | L         |
| 11 | 1    | 1     | 0    | 0     | 0    | 1     | 1    | 0     | L                   | R         |
| 12 | 0    | 1     | 1    | 0     | 1    | 1     | 1    | 0     | L                   | R         |
| 13 | 1    | 0     | 0    | 0     | 0    | 0     | 0    | 1     | L                   | L         |
| 14 | 0    | 1     | 1    | 1     | 0    | 1     | 1    | 1     | L                   | R         |
| 15 | 1    | 0     | 0    | 1     | 1    | 1     | 0    | 1     | R                   | L         |
| 16 | 0    | 0     | 0    | 1     | 1    | 0     | 0    | 1     | L                   | R         |
| 17 | 0    | 1     | 1    | 0     | 0    | 1     | 1    | 1     | R                   | L         |
| 18 | 0    | 1     | 0    | 0     | 1    | 1     | 0    | 0     | L                   | R         |
| 19 | 0    | 1     | 1    | 1     | 1    | 0     | 0    | 1     | L                   | R         |
| 20 | 0    | 1     | 0    | 1     | 1    | 1     | 0    | 1     | L                   | R         |
| 21 | 0    | 1     | 0    | 0     | 1    | 1     | 1    | 0     | L                   | R         |
| 22 | 0    | 1     | 1    | 0     | 1    | 1     | 1    | 0     | L                   | R         |
| 23 | 0    | 1     | 1    | 1     | 1    | 1     | 1    | 0     | L                   | R         |
| 24 | 0    | 1     | 0    | 0     | 1    | 1     | 0    | 0     | L                   | R         |
| 25 | 0    | 1     | 0    | 1     | 1    | 1     | 1    | 1     | L                   | R         |
| 26 | 0    | 1     | 0    | 0     | 0    | 0     | 1    | 1     | L                   | R         |
| 27 | 1    | 1     | 1    | 0     | 1    | 0     | 1    | 0     | L                   | R         |
| 28 | 0    | 1     | 0    | 1     | 1    | 1     | 1    | 1     | L                   | R         |

|    |   |   |    |    |   |   |   |    |   |   |
|----|---|---|----|----|---|---|---|----|---|---|
| 29 | 0 | 1 | 0  | 0  | 1 | 1 | 1 | 0  | R | L |
| 30 | 1 | 0 | 1  | 1  | 0 | 1 | 1 | 1  | R | L |
| 31 | 0 | 1 | 1  | 1  | 1 | 1 | 1 | 1  | L | R |
| 32 | 1 | 0 | 1  | 0  | 0 | 1 | 1 | 1  | L | L |
| 33 | 0 | 0 | 0  | 1  | 0 | 1 | 0 | 1  | R | R |
| 37 | 0 | 1 | 0  | NA | 1 | 1 | 1 | NA | L | R |
| 35 | 0 | 0 | NA | NA | 0 | 1 | 0 | 1  | L | R |
| 36 | 1 | 0 | 1  | 1  | 0 | 1 | 1 | 0  | R | L |
| 37 | 1 | 0 | 1  | 1  | 1 | 1 | 1 | 1  | L | L |
| 38 | 0 | 1 | 0  | 1  | 0 | 1 | 1 | 1  | R | R |
| 39 | 0 | 1 | 0  | 1  | 1 | 1 | 0 | 1  | L | R |
| 40 | 0 | 0 | 0  | 0  | 1 | 0 | 0 | 1  | R | L |
| 41 | 1 | 0 | 1  | 1  | 1 | 0 | 1 | 1  | R | L |
| 42 | 0 | 0 | 0  | 0  | 0 | 1 | 0 | 0  | L | R |
| 43 | 0 | 1 | 0  | 1  | 0 | 0 | 1 | 1  | R | R |
| 44 | 0 | 1 | 0  | 0  | 1 | 1 | 0 | 1  | R | R |
| 45 | 1 | 0 | 1  | 0  | 1 | 0 | 1 | 0  | L | R |
| 46 | 0 | 1 | 0  | 0  | 1 | 1 | 1 | 1  | L | R |
| 47 | 1 | 0 | 1  | 1  | 1 | 1 | 0 | 1  | R | L |
| 48 | 1 | 0 | 0  | 1  | 1 | 0 | 0 | 1  | L | R |
| 49 | 0 | 1 | 0  | 1  | 1 | 1 | 1 | 1  | R | R |
| 50 | 0 | 1 | 1  | 0  | 1 | 1 | 1 | 1  | R | R |
| 51 | 1 | 0 | 1  | 0  | 1 | 1 | 1 | 1  | L | R |
| 52 | 1 | 0 | 1  | 1  | 1 | 1 | 1 | 1  | R | L |
| 53 | 0 | 0 | 0  | 0  | 1 | 0 | 0 | 0  | R | L |
| 54 | 0 | 1 | 1  | 0  | 1 | 1 | 1 | 1  | L | R |
| 55 | 0 | 1 | 1  | 1  | 1 | 1 | 1 | 1  | L | R |
| 56 | 0 | 1 | 1  | 0  | 1 | 1 | 1 | 1  | L | R |
| 57 | 0 | 1 | 1  | 1  | 0 | 1 | 1 | 1  | L | R |
| 58 | 1 | 1 | 1  | 1  | 0 | 1 | 1 | 1  | L | R |
| 59 | 0 | 1 | 0  | 0  | 1 | 1 | 0 | 0  | R | R |
| 60 | 0 | 1 | 0  | 0  | 1 | 1 | 1 | 0  | L | R |

**Abbreviation:** *MVMC (maximal voluntary muscle contraction); R (right); L (Left); NA (Not assessed); EO (external oblique muscle); QL (quadratus lumborum muscle); RA (rectus abdominis muscle); PSp (paraspinal muscles); PD (Parkinson's disease); PS (Pisa Syndrome).*
